# Supplementary material for: Elevated Micro- and Nanoplastics Detected in Preterm Human Placentae
Source: Research Square preprint supplement (doi:10.21203/rs.3.rs-5903715/v1), 2025-02-03
Supplement: Supplementary file 1 [file c473a91bad272d11ed28630a.docx]

SUPPLEMENTAL INFORMATION

Title: Elevated Micro- and Nanoplastics Detected in Preterm Human Placentae

Authors: Michael D. Jochum, Ph.D.1,#, Marcus A. Garcia, Pharm.D.2,#, Alexandra L. Hammerquist, M.D. 1, Jacquelyne C. Howell, B.S. 1, Myla C. Stanford, B.S. 1, Rui Liu2, Marian Olewine, B.S.2, Eliane El Hayek, Ph.D.2, Emily Phan, B.S.2, Lori A. Showalter, M.S.1, Cynthia Shope, M.S.1, Melissa A. Suter, Ph.D.1, Matthew J. Campen, Ph.D.2, Kjersti M. Aagaard, M.D., Ph.D.3, 4, 5, Enrico R. Barrozo, Ph.D.1,*

Affiliations

1Department of Obstetrics and Gynecology, Baylor College of Medicine and Texas Children’s Hospital, Houston, TX, USA.

2Department of Pharmaceutical Sciences, University of New Mexico, Albuquerque, NM, USA.

3Oregon National Primate Research Center, Beaverton, OR, USA.

4HCA Healthcare and HCA Healthcare Research Institute Nashville, TN and HCA Texas Maternal Fetal Medicine, Houston, TX, USA.

5Maternal Fetal Care Center, Division of Fetal Medicine and Surgery, Boston Children’s Hospital, Harvard Medical School, Boston, MA, USA.

#Contributed equally

***Corresponding Author**

Enrico R. Barrozo, Ph.D.

Assistant Professor

Department of Obstetrics and Gynecology

Baylor College of Medicine and Texas Children’s Hospital

1 Baylor Plaza, Houston, TX 77030

Enrico.Barrozo@bcm.edu.

**
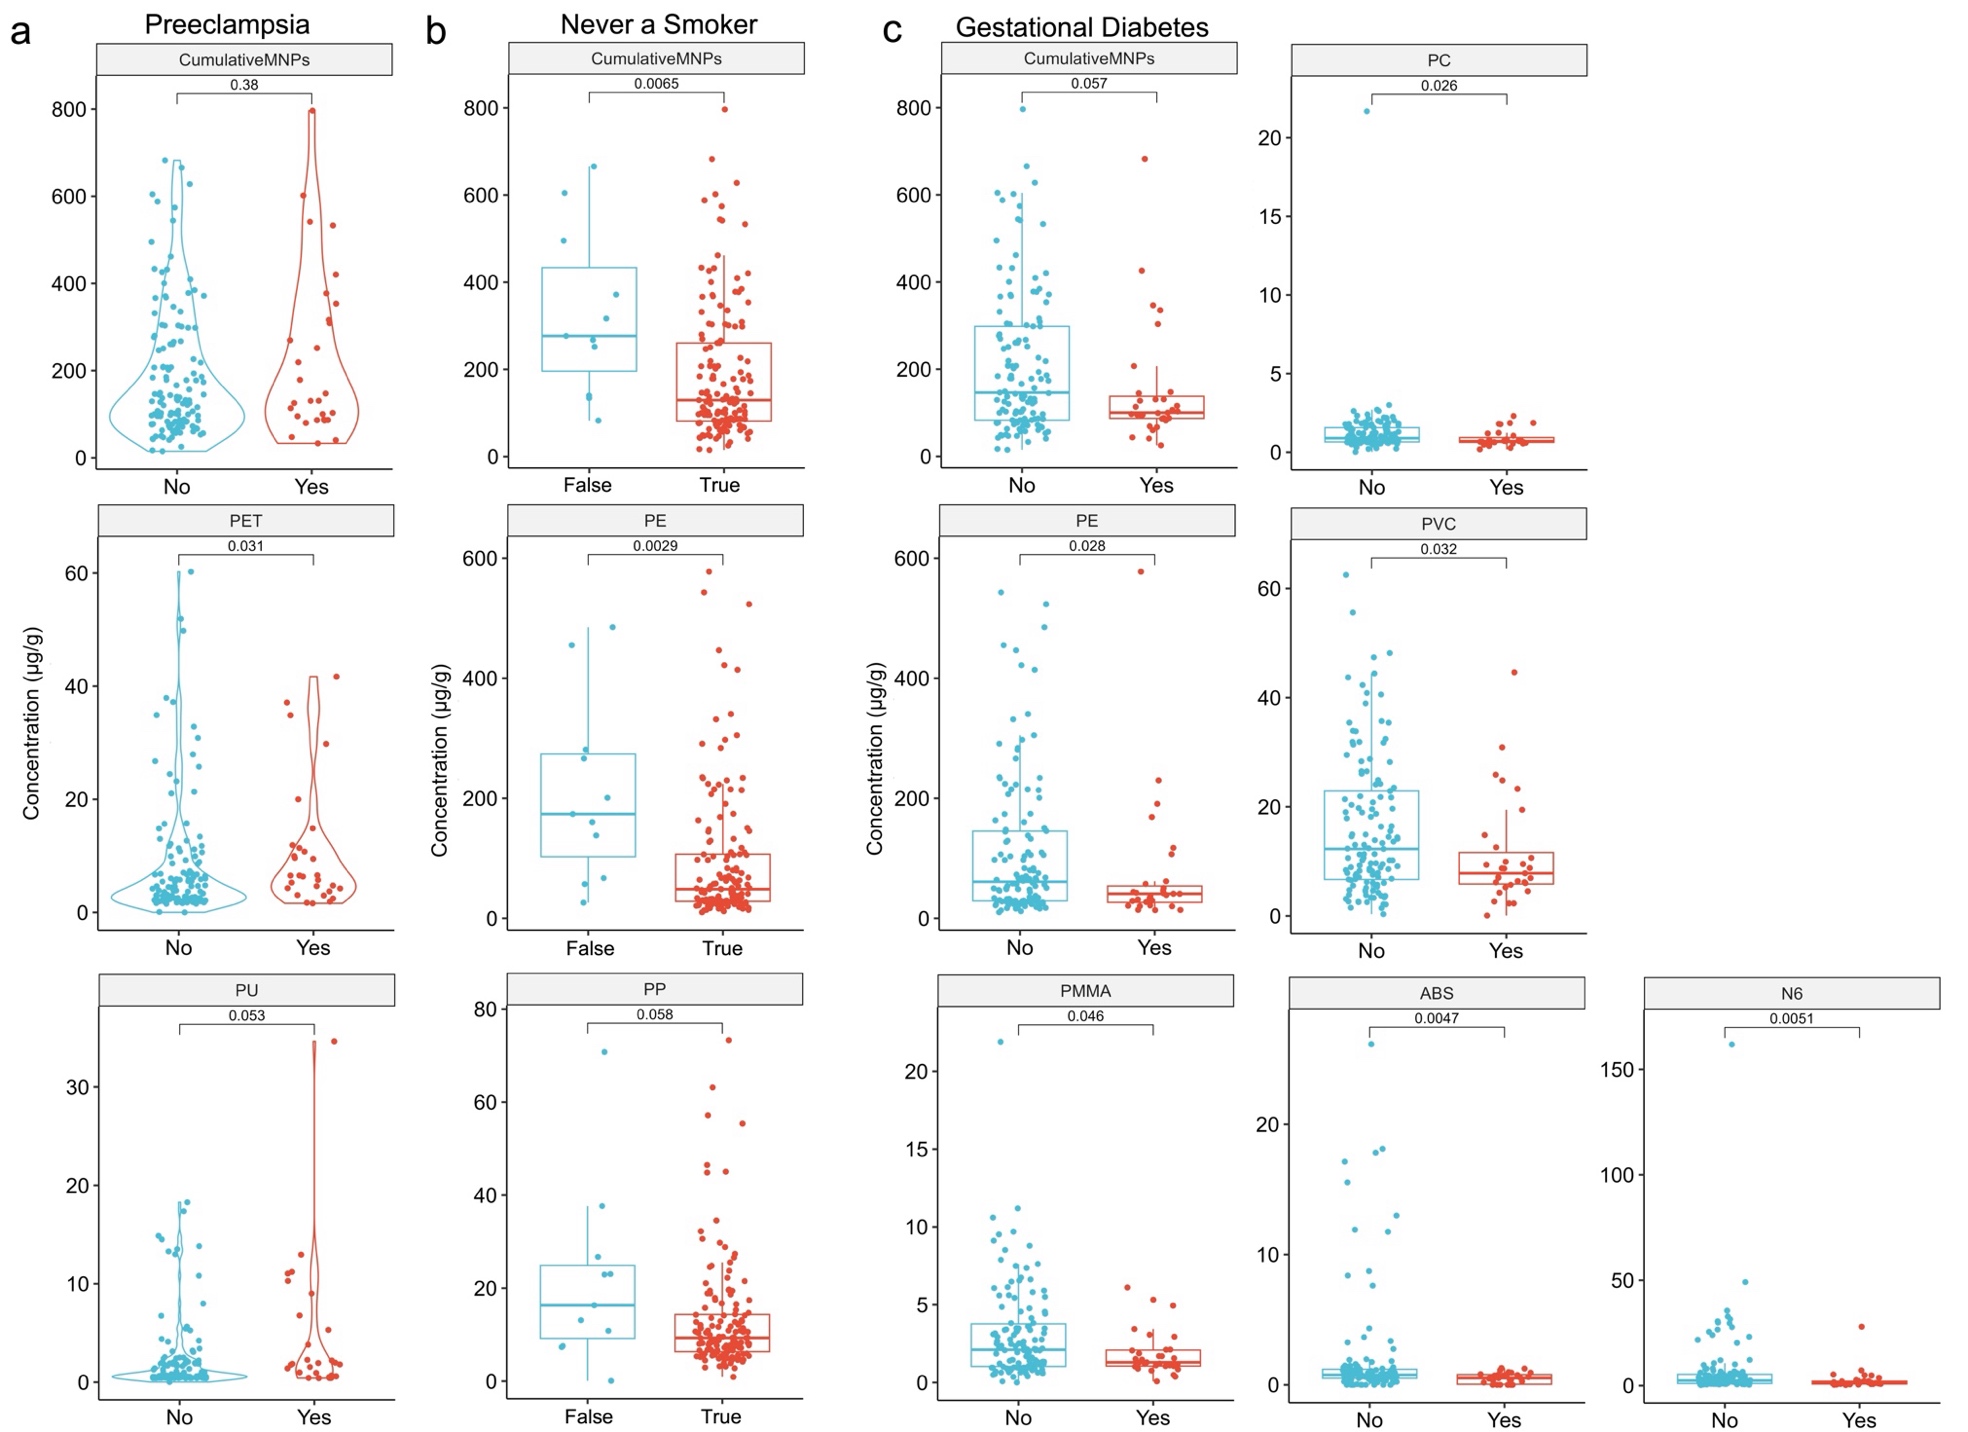
**

**Fig. S1: Specific MNPs were significantly different when stratified by preeclampsia, smoking history, and gestational diabetes, related to Fig. 2.** **a**, Violin or box plots with individual subjects ' data comparing preterm and term concentrations of cumulative or specific MNPs stratified by **a**, Preeclampsia, yes (*n*=29), **b**, Never a Smoker, true (*n*=147), or **c**, Gestational Diabetes, yes (*n*=31). Significance was determined by Wilcoxon tests, with significance defined as *p*<0.05.

**Table S1 [Uploaded separately as .xlsx file].** Table S1a: Coded MNP and clinical metadata, related to Tables 1-2 and Figs. 1-4. Table S1b: Raw Extracted Ion Chromatogram Spectrum of the 12 polymers MNPs analyzed and the Pyrolysis-Gas Chromatography/Mass Spectrometry parameters for analysis, related to Table 2 and Figs. 1-4. Table S1c: Spearman’s correlation analysis with Benjamini-Hochberg multiple corrections, related to Fig. 2a. Table S1d: Unadjusted and adjusted regression models for PTB and MNPs. The unadjusted model excludes covariates, while the adjusted model includes maternal, fetal, and labor-related covariates. Columns show coefficients, standard errors, z-values, p-values, significance (*p*<0.05, **p*<0.01, ***p*<0.001), AORs, and 95% CIs. Undefined or infinite CIs are marked as NA., related to Fig. 4.
