# Supplementary material for: Elevated Micro- and Nanoplastics Detected in Preterm Human Placentae
Source: Research Square preprint supplement (doi:10.21203/rs.3.rs-5903715/v1), 2025-02-03
Supplement: Supplementary file 2 [file cd1b18caf3c1b329d050e7f5.xlsx]

## Sheet: S1a
Table S1a: Coded MNP and clinical metadata, related to Tables 1-2 and Figs. 1-4.
TissueID	Delivery_Term	PE	PP	PS	ABS	SBR	PMMA	PC	PVC	PU	PET	N6	N66	CumulativeMNPs	Gestational_Age	Maternal_Age_years	Gravida	PriorTermBirth	PriorPretermBirth	Prior_PTB_yes	SDI_score	PovertyLT100_FPL_score	Single_Parent_Fam_score	Education_LT12years_score	HHNo_Vehicle_score	HHRenter_Occupied_score	HHCrowding_score	Nonemployed_score	Ethnicity_Race_Hispanic_White	Ethnicity_Race_Non.Hispanic_Asian	Ethnicity_Race_Non.Hispanic_Black	Ethnicity_Race_Non.Hispanic_White	Asthma_Yes	Hypertension_Yes	Substance.use..alcohol.or.other._Yes	Mental.health.issues_Yes	Prior.GDMA1_Yes	Prior.GDMA2_Yes	Maternal.smoking_Ever	Maternal.smoking_Never	Maternal.alcohol_Ever	Maternal.alcohol_Never	Non.reassuring.fetal.status_Yes	Uncontrolled.diabetes_Yes	PROM_Yes	Gestational.diabetes_Yes	Oligohydramnios_Yes	Chorioamnionitis_Yes	Type.of.labor_No.Labor
20	Preterm	22.5152	5.61866	0	0.626775	20.4868	0.829615	0.62069	4.62475	0.557809	1.84584	0.975659	3.73225	62.4341	32.8571	37	5	3	0	no	75	68	69	65	64	94	80	12	1	0	0	0	0	0	0	0	0	0	0	1	0	1	0	0	0	0	0	0	0
39	Term	47.9253	7.67635	0	0.962656	56.2241	2.07469	0.906639	10.2075	0.446058	2.53112	1.51245	14.6473	145.114	40.1429	29	2	0	0	no	94	94	83	94	83	92	95	39	0	0	1	0	0	0	0	0	0	0	0	1	0	1	0	0	0	0	0	0	0
83	Preterm	46.2331	7.35274	0	0.782621	48.7397	1.47333	1.1976	10.6392	0.590447	2.98009	1.22546	9.44158	130.656	36.1429	36	4	2	0	no	93	93	92	94	89	61	80	96	1	0	0	0	0	1	0	0	1	1	0	1	1	0	0	0	0	1	0	0	1
91	Preterm	305.047	46.4833	0	1.18932	101.682	5.59253	2.40588	40.8545	2.26969	9.6235	7.8713	18.4299	541.449	36.7143	26	3	2	0	no	75	68	69	65	64	94	80	12	1	0	0	0	0	1	0	0	0	0	0	1	0	1	0	0	0	0	1	0	1
138	Term	53.5597	13.1254	0	0.915805	43.6412	2.16222	1.21666	13.8858	0.697598	3.8682	1.52083	9.0258	143.619	41.2857	19	1	0	0	no	94	93	85	99	79	78	96	67	0	0	1	0	0	0	0	0	0	0	0	1	0	1	0	0	0	0	0	0	0
166	Preterm	50.5092	11.609	0	0.780041	39.1039	2.11813	0.718941	9.5112	0.435845	3.70672	2.66802	9.6945	130.855	36.7143	41	2	1	0	no	97	98	95	97	89	100	98	25	1	0	0	0	0	0	0	0	0	0	0	1	0	1	0	0	0	1	0	0	1
214	Term	61.7476	10.6796	0	0.71068	16.699	1.29515	0.545631	6.99029	0.526214	1.81165	2.09709	3.33981	106.443	39	38	4	2	0	no	24	28	7	4	48	96	1	14	1	0	0	0	0	0	0	0	0	0	0	1	0	1	0	0	0	1	0	0	1
236	Term	43.9175	8.82474	0	0.927835	48.2474	1.56082	0.795876	9.38144	0.558763	2.51546	1.55876	9.31959	127.608	39.1429	26	1	0	0	no	92	83	89	94	64	89	92	74	0	1	0	0	0	0	0	0	0	0	0	1	0	1	0	0	0	1	0	0	0
376	Term	53.6481	12.0815	0	0.654506	31.9742	2.07725	0.776824	9.63519	0.461373	2.53219	2.72532	7.72532	124.292	41.4286	40	2	1	0	no	94	94	83	94	83	92	95	39	0	0	1	0	0	0	0	0	0	0	0	1	0	1	0	0	0	0	0	0	1
383	Term	22.0472	5.49213	0	0.184449	11.0039	0.531496	0.224409	2.14567	0.639764	1.74409	0.659449	2.14567	46.8183	37.8571	23	3	2	0	no	99	97	95	98	91	98	98	69	0	0	1	0	0	0	0	0	0	0	0	1	0	1	0	0	0	0	0	0	1
414	Term	340.363	63.1545	0	0.709789	54.324	6.48311	0.771267	33.9246	1.8611	9.94822	10.06	11.3454	532.945	37.2857	40	6				94	89	93	96	71	91	93	53	1	0	0	0	0	1	0	0	0	0	0	1	0	1	0	0	0	0	0	0	1
415	Term	65.7641	14.3912	0	1.00354	36.1702	2.13093	1.36653	14.135	0.896783	4.48391	1.54161	7.08886	148.973	41.4286	19	1	1	0	no	94	89	93	96	71	91	93	53	1	0	0	0	0	0	0	0	0	0	0	1	0	1	0	0	0	0	0	0	0
416	Term	75.3968	10.873	0	1.59127	74.2063	3.37302	0.964286	15.5556	0.458333	4.18651	3.71032	17.4405	207.756	37.8571	40	5	4	0	no	97	98	95	97	89	100	98	25	1	0	0	0	0	0	0	0	0	0	0	1	0	1	0	0	0	0	0	0	1
424	Preterm	229.799	44.855	8.3965	1.28894	62.2372	5.31778	1.80451	44.634	1.84134	6.01012	7.21068	12.5947	425.99	36.2857	20	1	1	0	no	93	95	86	100	70	70	93	66	0	0	1	0	0	0	0	0	0	0	0	1	0	1	0	0	0	1	0	0	0
426	Preterm	29.3983	8.08915	0	0.514328	19.6917	1.28868	0.953139	8.87232	2.24021	2.90839	1.26798	4.6585	79.8827	34.8571	24	1	0	0	no	94	88	90	98	72	86	92	70	0	1	0	0	0	0	0	0	0	0	0	1	0	1	0	0	0	0	0	0	0
499	Term	34.1847	8.44794	0	0.815324	22.9862	0.952849	0.585462	7.09234	0.530452	2.27898	1.4499	3.71316	83.0373	41.2857	36	3	1	0	no	97	98	95	97	89	100	98	25	0	0	1	0	0	0	0	0	0	0	0	1	0	1	1	0	0	0	0	0	0
694	Preterm	523.338	73.3128	0	1.34811	92.3983	9.69425	1.9237	55.5905	1.93885	6.52847	12.1935	18.101	796.367	35.4286	19	1	0	0	no	59	67	64	33	85	56	15	74	0	0	1	0	0	0	0	0	0	0	0	1	0	1	0	0	0	0	0	0	0
755	Preterm	33.697	11.2646	0	0	4.32929	1.51515	0.652525	5.22424	12.9556	19.998	1.53737	8.85657	100.03	36.8571	37	8	0	0	no	94	86	88	100	87	90	96	37	1	0	0	0	0	0	0	0	0	0	0	1	0	1	0	0	0	1	0	0	1
901	Term	28.9528	6.65298	0	0.825462	24.846	0.903491	0.616016	6.03696	0.550308	2.11499	0.887064	4.76386	77.1499	41.2857	18	1	0	0	no	74	72	67	95	9	45	93	86	0	0	1	0	0	0	0	0	0	0	0	1	0	1	1	0	0	0	0	0	0
1056	Term	105.479	14.1487	0	1.13699	56.3601	4.55969	0.894325	19.7652	0.497065	5.44031	6.5362	11.5656	226.384	39.4286	35	1	0	0	no	69	54	68	74	42	85	81	19	0	0	1	0	0	1	0	0	0	0	0	1	0	1	0	0	0	0	0	0	0
1171	Term	28.8577	4.66934	0	0.677355	15.8317	0.763527	0.723447	5.1503	0.43487	1.76553	0.573146	3.60721	63.0541	40.1429	33	1	0	0	no	16	17	24	25	7	31	49	13	0	1	0	0	0	0	0	0	0	0	0	1	0	1	0	0	0	0	0	0	0
1246	Preterm	25.7437	24.5613	26.1503	26.1503	26.2639	21.8974	21.6757	28.7632	34.6378	41.6838	49.1094	53.0155	353.502	35.7143	30	2	1	0	no	86	89	85	92	50	49	89	96	1	0	0	0	0	0	0	0	0	0	0	1	0	1	0	0	0	0	0	0	1
1318	Preterm	11.8085	6.18569	0	0	9.33269	0.94971	0.729207	6.81818	11.0406	34.8549	0.516441	3.42553	85.6615	35.2857	32	3	2	0	no	94	94	83	94	83	92	95	39	1	0	0	0	0	0	0	0	0	0	0	1	0	1	0	0	0	0	0	0	1
1452	Term	67.9901	12.8906	0	0.712127	33.5627	0.919635	0.864614	3.81216	2.55454	6.68897	1.64277	5.42349	137.062	39.4286	28	4	2	2	yes	99	97	95	98	91	98	98	69	0	0	1	0	0	0	0	0	0	0	0	1	1	0	0	0	0	0	0	0	0
1759	Preterm	23.34	4.42656	0	0.513078	19.9396	0.714286	0.678068	3.66197	0.418511	1.96579	0.515091	4.18511	60.3581	34.4286	23	3	0	1	yes									1	0	0	0	0	0	0	0	0	0	0	1	0	1	0	0	0	0	0	0	1
1815	Term	37.5494	14.2885	0	0.772727	14.9407	0.833992	0.772727	5.55336	0.424901	3.85375	0.847826	3.10277	82.9407	39.1429	35	2	1	0	no	67	58	70	83	52	44	85	31	0	1	0	0	0	0	0	0	0	0	0	1	0	1	0	0	0	0	0	0	1
1869	Preterm	23.709	10.3668	0	0	12.3504	1.32377	0.702869	10.6516	4.22131	30.8402	0.788934	4.52664	99.4816	36	24	2	1	0	no	94	88	90	98	72	86	92	70	1	0	0	0	0	0	0	0	0	0	0	1	0	1	0	0	0	0	0	0	0
1973	Preterm	47.0735	10.5012	0	0.235744	12.4399	1.38981	0.960484	7.88402	4.11122	5.53382	1.87259	10.3537	102.356	34.4286	25	3	2	0	no	74	72	67	95	9	45	93	86	1	0	0	0	0	0	0	0	0	0	0	1	0	1	0	0	0	0	0	0	1
2189	Preterm	26.9552	7.7026	0	0.191262	7.60943	0.97157	0.500766	6.03689	6.77879	14.8685	1.08901	7.21624	79.9202	35.1429	29	4	0	1	yes	94	88	90	98	72	86	92	70	1	0	0	0	0	0	0	0	0	0	0	1	0	1	0	0	0	0	0	0	1
2234	Term	144.444	19.7111	0	1.21333	66.2222	6.55556	0.953333	24.8889	0.562222	3.66667	12.0444	17.8667	298.129	41.4286	27	4	3	0	no	99	99	93	98	93	89	89	91	0	0	1	0	0	0	0	0	0	0	0	1	0	1	0	0	0	0	1	1	0
2386	Term	106.46	21.0613	0	0.59187	39.5861	2.47509	0.603399	13.0288	1.27214	3.75491	3.4167	9.41611	201.666	37	29	7	0	0	no	71	79	86	2	74	99	64	56	0	0	0	1	0	0	0	0	0	0	0	1	0	1	0	0	0	0	0	0	1
2413	Preterm	233.918	29.7639	0	0.777346	56.6708	3.8198	1.97207	28.3369	1.79872	5.72826	5.00334	9.4688	377.258	35.5714	31	5	3	1	yes	99	97	95	98	91	98	98	69	0	0	1	0	0	1	0	0	0	0	0	1	0	1	0	0	0	0	0	0	0
2452	Term	67.7664	21.5164	0	0	20.2582	2.5	0.639344	14.3955	13.2848	60.2254	1.86475	4.97131	207.422	38	29	1	0	0	no	15	17	23	35	17	11	58	1	0	0	1	0	0	0	0	0	0	0	0	1	0	1	0	0	0	0	0	0	0
2561	Term	129.414	32.2338	0	0.246276	31.1908	3.47315	1.06223	13.6227	17.3683	37.1837	4.11973	9.97345	279.888	37.1429	46	8	6	0	no	51	47	60	74	11	21	84	60	1	0	0	0	0	0	0	0	0	1	0	1	0	1	0	0	0	0	0	0	1
2574	Term	27.1902	5.19184	0	0.714276	47.4636	0.883248	0.812825	2.64697	1.31111	3.3429	0.594996	6.79706	96.9491	37	43	2	0	1	yes	68	48	82	49	53	93	69	48	0	1	0	0	0	1	0	0	0	0	0	1	0	1	0	0	0	1	0	0	1
2579	Term	190.797	25.5256	0	0.401362	64.2007	2.93931	2.30332	25.8694	2.02829	6.82401	3.65265	10.6571	335.199	38.1429	31	4	2	0	no	99	97	95	98	91	98	98	69	0	0	0	0	0	0	0	0	0	0	0	1	0	1	0	0	0	1	0	0	1
2692	Preterm	57.2549	8.05882	0	0.533333	46.0784	2.05882	0.811765	14.8235	0.439216	3.15686	2.13725	9.4902	144.843	35.5714	43	4	1	0	no	99	97	95	98	91	98	98	69	1	0	0	0	0	1	0	0	1	0	0	1	0	1	0	0	0	1	0	0	1
2901	Preterm	22.6531	4.91837	0	0.795918	38.1633	0.791837	0.691837	7.53061	0.559184	2.46939	0.893878	6.12245	85.5898	36.2857	41	1	0	0	no	94	89	93	96	71	91	93	53	1	0	0	0	0	0	0	0	0	0	0	1	0	1	0	0	0	0	0	0	1
2920	Preterm	30.8087	10.6016	0	0	8.54241	1.33333	0.637081	8.34714	4.38264	49.783	1.08481	5.54438	121.065	36.8571	26	2	1	0	no	97	98	95	97	89	100	98	25	1	0	0	0	0	0	0	0	0	0	0	1	0	1	0	0	0	0	0	0	1
2963	Preterm	206.925	7.28155	0	8.3876	6.7746	5.43812	1.46092	24.195	1.70517	9.21715	21.7064	5.20769	298.299	33.4286	32	3	2	0	no	87	85	76	94	60	88	91	36	1	0	0	0	0	0	0	0	0	0	0	1	0	1	0	0	0	0	1	0	1
2987	Term	173.641	22.9229	0		39.4847	2.75648	1.52437	20.3441	1.34672	5.39834	3.59316	5.46711	276.479	39.5714	36	5	3	1	yes	67	58	70	83	52	44	85	31	0	0	0	1	0	0	0	0	0	0	1	0	0	1	0	0	0	0	0	0	1
3057	Term	283.832	8.51495	0	15.5386	8.75549	8.51495	1.53943	35.6954	1.8858	9.91006	26.5551	32.4242	433.166	39	24	5	3	0	no	42	37	57	53	28	31	56	48	0	0	0	1	0	1	0	0	0	0	0	1	0	1	0	0	0	0	0	0	1
3067	Preterm	57.8991	15.7676	0	0.328578	12.657	2.18462	1.20877	8.67745	11.2141	4.74198	2.90614	7.97949	125.565	36.8571	32	2	1	0	no	95	91	94	78	92	91	79	90	1	0	0	0	0	1	0	0	0	0	0	1	0	1	0	0	0	0	1	0	1
3084	Term	281.083	37.6545	0	0.228049	99.5871	6.12844	1.90335	26.5173	1.40836	5.77487	6.77664	28.0494	495.111	39	22	3	2	0	no	79	67	80	71	75	72	70	71	0	0	1	0	0	0	0	0	0	0	0	0	0	1	0	0	0	0	0	0	1
3088	Preterm	145.534	24.8188	0	2.75475	64.5808	2.33894	3.00164	29.4967	3.20955	12.1235	4.6389	10.7461	303.244	30.2857	28	1	0	0	no	75	68	69	65	64	94	80	12	1	0	0	0	0	1	0	0	0	0	0	1	0	1	0	0	0	0	0	0	1
3131	Term	18.8189	5.19685	0	0.59252	14.2323	0.787402	0.535433	3.85827	0.523622	1.72244	0.700787	3.01181	49.9803	39.2857	26	5	1	0	no	89	87	93	86	83	51	81	97	0	0	1	0	0	0	0	0	0	0	0	1	0	1	0	0	0	0	0	0	1
3158	Term	29.5218	5.88358	0	0.611227	42.2037	1.8711	0.819127	8.23285	0.444906	2.18295	0.858628	9.93763	102.568	39.2857	36	2	1	0	no	51	33	66	75	16	55	73	16	0	1	0	0	0	0	0	0	0	1	0	1	0	1	0	1	0	0	0	0	0
3239	Term	110.223	18.6309	0	3.65627	144.77	6.74497	2.24969	44.4181	1.02408	7.03286	6.66271	30.7225	378.023	40.8571	22	1	0	0	no	97	98	95	97	89	100	98	25	0	1	0	0	0	0	0	0	0	0	0	1	0	1	0	0	0	0	0	0	0
3376	Preterm	26.0484	7.33266	1.88777	0	6.67137	1.05444	0.637097	6	3.13306	25.7661	0.816532	4.87298	82.3327	36.8571	39	2	0	1	yes	57	56	55	38	64	81	54	24	1	0	0	0	0	1	0	0	0	1	1	0	1	0	0	0	0	1	0	0	1
3688	Term	17.4593	4.9187	0	0.589431	35.7724	1.20732	0.640244	4.73577	0.54065	2.11382	0.788618	7.43902	76.2053	37	33	8	2	2	yes									0	0	1	0	0	1	0	0	0	0	0	1	0	1	0	0	0	0	0	0	1
3952	Preterm	147.679	9.3394	0	11.9077	9.16429	7.88012	1.86788	31.8707	2.2006	10.7403	29.8861	6.94618	269.483	33.7143	37	6	2	1	yes	97	98	95	97	89	100	98	25	1	0	0	0	0	1	0	0	0	0	0	1	0	1	0	0	0	0	0	0	1
4095	Preterm	33.7278	5.44379	0	0.564103	35.7002	1.14398	0.857988	9.11243	0.418146	1.97239	0.601578	7.04142	98.0888	32.5714	24	2	0	0	no									1	0	0	0	0	0	0	0	0	0	0	1	0	1	0	0	0	0	0	0	0
4383	Preterm	163.29	17.8806	1.50493	1.42601	59.4788	3.81256	1.83239	32.4363	1.86933	5.874	5.92572	11.0091	304.835	36.4286	36	3	1	0	no									1	0	0	0	0	1	0	0	0	0	0	1	0	1	0	0	0	0	0	0	1
4543	Term	56.2222	15.3333	0	0.537778	41.1111	2.62222	0.804444	10.1778	0.482222	4.62222	3.86667	10.6	146.38	40.4286	34	3	2	0	no	94	93	85	99	79	78	96	67	1	0	0	0	0	0	0	0	0	0	0	1	0	1	0	0	0	0	1	0	1
4626	Preterm	32.4797	6.86992	0	0	4.43902	0.955285	0.642276	3.39228	10.8171	5.85163	1.14024	6.88821	73.4756	27.2857	20	3	2	0	no	99	97	95	98	91	98	98	69	1	0	0	0	0	1	0	0	0	1	0	1	0	1	0	0	0	0	0	0	1
4628	Preterm	40.9434	12.4138	0	0.182178	9.0672	1.87198	0.481482	8.78076	6.7465	12.6799	2.05341	4.00432	99.225	34.5714	36	2	1	0	no	86	89	85	92	50	49	89	96	1	0	0	0	0	0	0	0	0	0	0	1	0	1	0	0	0	1	0	0	1
4934	Preterm	29.0421	8.54981	0	0	4.96169	1.09962	0.630268	8.69157	9.00383	29.7893	1.0249	10.113	102.906	27.2857	43	3	1	0	no	99	97	95	98	91	98	98	69	0	1	0	0	0	1	0	0	0	0	0	1	0	1	0	0	0	1	0	0	1
5012	Preterm	150.609	28.8376	0	0.322273	16.2023	3.32233	1.22499	17.8638	5.64159	51.9011	5.14651	19.93	301.001	34.1429	28	2	0	0	no	94	93	85	99	79	78	96	67	1	0	0	0	0	0	0	0	0	0	0	1	0	1	0	0	0	0	0	0	0
5107	Preterm	28.0315	9.27362	0	0	7.21654	1.20669	0.65748	8.40945	13.8189	24.4488	161.811	5.58071	260.455	36.4286	29	2	1	0	no	94	89	93	96	71	91	93	53	0	1	0	0	0	0	0	0	0	0	0	1	0	1	0	0	0	0	0	0	1
5327	Preterm	31.4423	11.6692	0	0	12.5827	1.69423	0.701923	9.92115	3.81346	37.0962	1.025	3.61923	113.565	33.1429	34	8	7	0	no	97	97	97	87	95	90	70	100	0	0	1	0	1	1	0	0	0	0	0	1	0	1	0	0	0	1	0	0	1
5352	Term	36.8321	8.14885	0	0.748092	45.4198	1.70038	0.784351	7.82443	0.406489	2.70992	1.62023	9.73282	115.927	39.1429	28	1	0	0	no	97	98	95	97	89	100	98	25	0	1	0	0	0	0	0	0	0	0	0	1	0	1	0	0	0	1	0	1	0
5460	Preterm	138.08	23.0317	0	0.983129	48.1623	2.72846	1.30347	18.9446	1.39185	4.22525	3.98222	8.83711	251.67	36.4286	40	1	0	0	no	40	39	21	79	25	22	82	29	0	1	0	0	0	0	0	0	0	0	1	0	0	1	0	0	0	0	0	0	0
5505	Term	103.226	14.1331	0	0.655242	25.6048	1.94758	0.633065	9.27419	0.544355	2.01613	2.7621	5.32258	166.119	39.2857	35	3	2	0	no	44	33	72	56	12	24	65	73	0	0	0	1	0	0	0	0	0	0	0	1	0	1	0	0	0	0	0	0	1
5573	Term	23.4592	4.61233	0	0.506958	31.6103	0.966203	0.779324	5.40755	0.425447	1.63618	1.02982	6.58052	77.0139	39	25	4	3	0	no	39	29	49	39	46	74	26	9	1	0	0	0	0	0	0	0	0	0	0	1	0	1	0	0	0	0	0	0	1
5766	Preterm	80.0797	11.7729	0	0.840637	60.1594	3.60558	0.816733	14.5817	0.456175	2.86853	4.40239	13.8048	193.388	36.8571	32	5	2	1	yes	99	97	95	98	91	98	98	69	1	0	0	0	0	0	0	0	0	0	0	1	0	1	0	0	0	0	0	0	0
5778	Term	27.6688	4.74946	0	0.771242	23.9651	1.17865	0.797386	7.42919	0.464052	2.24401	0.83878	5.03268	75.1394	40.1429	37	2	1	0	no	97	98	95	97	89	100	98	25	0	1	0	0	0	0	0	0	0	0	0	1	0	1	0	0	0	0	1	0	0
5937	Preterm	97.137	16.728	0	0.341513	37.8323	2.65849	0.578732	11.3292	0.678937	2.10634	2.94479	11.4519	183.787	33.1429	35	6	0	3	yes	34	33	25	30	28	83	45	3	1	0	0	0	0	0	0	0	0	0	0	1	0	1	0	0	0	0	0	0	1
6077	Preterm	32.0823	8.24661	0	0.437315	15.3385	1.60837	1.02386	7.85685	5.2601	21.0362	2.34347	12.0523	107.286	36.1429	28	3	1	1	yes	94	86	88	100	87	90	96	37	0	0	0	0	0	0	0	0	0	0	0	1	0	1	0	0	0	0	0	0	1
6557	Term	29.1747	5.81574	0	0.489443	26.1036	1.06142	0.671785	5.71977	0.410749	1.99616	0.723608	5.39347	77.5605	39	24	4	3	0	no	97	97	97	87	95	90	70	100	0	0	1	0	0	0	0	0	0	0	0	1	0	1	0	0	0	0	0	0	1
6810	Preterm	214.879	27.3667	0	1.1048	70.2411	3.26373	2.2096	21.792	2.50354	7.30791	4.22663	11.5548	366.45	36.7143	20	2	0	1	yes	97	98	95	97	89	100	98	25	1	0	0	0	0	1	0	0	0	0	0	1	0	1	0	0	0	0	0	0	1
6821	Preterm	40.8266	8.45565	0	0	6.42137	1.10081	0.641129	4.52823	10.2903	11.3851	0.893145	3.09677	87.6391	34	38	3	2	0	no	94	86	88	100	87	90	96	37	1	0	0	0	0	0	0	0	0	0	0	1	0	1	0	0	0	1	0	0	1
6867	Term	50.5643	9.43567	0	0.778781	23.0248	1.33409	0.656885	6.68172	0.604966	2.50564	1.68623	4.37923	101.652	40	40	5	4	0	no									0	1	0	0	0	0	0	0	0	0	0	1	0	1	0	0	0	0	0	1	1
7009	Preterm	67.838	19.4681	0	0.389613	17.3172	2.50688	1.04376	14.9529	14.5051	27.9371	3.77566	8.2485	177.983	36.7143	27	3	2	0	no	97	98	95	97	89	100	98	25	1	0	0	0	0	0	0	0	0	0	0	1	0	1	0	0	0	0	0	0	0
7038	Term	49.8031	6.59449	0	1.08268	84.6457	2.93307	1.16535	16.3583	0.452756	2.6378	2.26378	17.2047	185.142	39.5714	36	2	1	0	no	67	58	70	83	52	44	85	31	0	0	0	0	0	0	0	0	0	0	0	1	0	1	0	0	0	0	0	0	1
7211	Preterm	32.051	6.74168	0	0.447581	13.7345	0.944031	1.17762	8.58334	5.30977	4.27419	2.04059	11.4148	86.7191	34	19	1	0	0	no	99	97	95	98	91	98	98	69	1	0	0	0	0	1	0	0	0	0	0	1	0	1	0	0	0	0	0	0	0
7585	Term	26.7347	4.87755	0	0.655102	3.26531	0.4	0.493878	2.10204	0.540816	1.54082	0.642857	1.37755	42.6306	40.8571	36	10	6	0	no	95	94	84	93	88	90	75	83	0	0	0	1	0	0	0	1	0	0	0	1	1	0	0	0	0	0	0	0	0
7601	Term	24.1309	6.05317	0	0.781186	23.9264	0.750511	0.625767	4.68303	0.548057	1.99387	0.9182	3.53783	67.9489	39.2857	33	5	4	0	no	54	69	48	90	17	14	93	5	0	0	0	0	0	0	0	0	0	0	0	1	0	1	0	0	0	0	0	0	1
7609	Preterm	132.467	19.4184	0	0.748888	51.6318	2.20527	1.65583	19.6442	1.86657	6.18679	2.99555	7.82757	246.647	36.2857	38	4	1	0	no	69	54	68	74	42	85	81	19	0	0	1	0	0	0	0	0	0	0	0	1	0	1	0	0	0	0	0	0	1
7914	Preterm	421.689	55.3785	0		51.3775	5.90619	1.77186	38.9301	1.53688	5.27112	8.00194	11.8759	601.739	36.2857	39	1	0	0	no	93	89	89	98	78	86	93	51	1	0	0	0	0	0	0	0	0	0	0	1	0	1	0	0	0	0	0	0	0
8381	Preterm	21.6082	6.55258	0	0	5.35876	0.845361	0.665979	4.25155	1.00619	15.732	0.620619	3.38557	60.0268	35.1429	27	2	1	0	no	94	88	90	98	72	86	92	70	1	0	0	0	0	0	0	0	0	0	0	1	0	1	0	0	0	1	0	0	0
8425	Preterm	13.6944	3.19149	0	0.388781	17.4468	0.377176	0.272727	2.30174	0.626692	1.81625	0.479691	2.94004	43.5358	35.5714	31	3	2	0	no	55	43	65	67	17	64	70	29	1	0	0	0	0	0	0	0	0	0	0	1	0	1	0	0	0	1	0	0	0
8426	Preterm	20.1091	9.93131	0	0	8.3899	1.17172	0.666667	7.12929	12.9919	23.1717	0.747475	3.75152	88.0606	32.1429	30	2	0	0	no	68	48	82	49	53	93	69	48	1	0	0	0	0	0	0	0	0	0	0	1	0	1	0	0	0	1	0	0	1
8639	Preterm	109.594	16.5466	0	1.46126	104.867	4.85654	2.14031	35.414	0.979903	6.57567	5.07143	21.3602	308.867	33.7143	28	4	0	3	yes	75	63	73	74	56	63	80	75	1	0	0	0	0	0	0	0	0	0	0	1	0	1	0	0	0	0	0	0	1
8652	Preterm	214.788	34.5327	0	0.422169	56.1041	3.40698	2.70336	31.385	2.20343	8.573	5.40673	8.03603	367.561	33.8571	35	5	4	0	no	74	72	67	95	9	45	93	86	0	0	1	0	0	1	0	1	0	0	0	1	0	1	0	0	0	0	0	0	1
8681	Preterm	64.2274	9.56275	0	0.896805	61.3729	2.36452	1.19178	19.0066	0.520956	4.63865	2.68804	12.1794	178.65	31.7143	37	2	1	0	no	79	67	80	71	75	72	70	71	1	0	0	0	0	0	0	0	0	0	0	1	0	1	0	0	0	0	0	0	1
8776	Preterm	48.7652	12.166	0	0	7.65587	1.44332	0.668016	9.65182	13.5162	37.915	1.23684	5.66802	138.686	35.4286	33	2	1	0	no	99	97	95	98	91	98	98	69	0	1	0	0	0	0	0	0	0	1	0	1	0	1	0	0	0	0	0	0	1
8891	Preterm	168.703	30.6115	0		52.7198	3.43529	1.8571	24.8293	1.62581	6.72093	4.80261	8.29912	303.605	31.1429	42	5	1	2	yes	79	67	80	71	75	72	70	71	0	0	0	0	0	0	0	0	1	0	0	1	0	1	0	0	0	1	0	0	1
9147	Preterm	577.642	6.61013	0	0.5169	8.03935	4.94271	1.86394	23.2843	2.03664	13.3989	27.9293	16.1382	682.403	34.1429	29	2	0	1	yes	97	98	95	97	89	100	98	25	1	0	0	0	0	0	0	0	1	0	0	1	0	1	0	1	0	1	0	0	1
9230	Term	41.7695	7.86008	0	0.331276	27.7778	1.05144	0.399177	6.15226	0.679012	2.46914	1.42387	5.57613	95.4897	37.2857	37	3	1	0	no	93	95	86	100	70	70	93	66	0	0	0	0	0	0	0	0	0	1	0	1	0	1	0	0	0	1	0	0	1
9352	Term	14	3.13131	0	0.567677	14.6465	0.482828	0.555556	2.30303	0.535354	1.52121	0.371717	2.84848	40.9636	39.2857	30	5	2	0	no	99	97	95	98	91	98	98	69	0	0	0	0	0	0	0	0	0	0	0	1	0	1	0	0	0	1	0	0	1
10053	Preterm	23.3266	5.92292	0	1.03245	46.4503	1.12576	0.778905	8.92495	0.543611	2.08925	1.14402	8.41785	99.7566	35.5714	34	2	1	0	no	86	89	85	92	50	49	89	96	1	0	0	0	0	0	0	0	0	0	0	1	0	1	0	0	0	0	0	0	0
10894	Term	290.84	8.19528	0	18.1159	6.65482	5.50255	2.61879	21.9363	2.39697	9.92061	20.2725	22.9222	409.376	39.2857	23	4	2	0	no	99	97	95	98	91	98	98	69	0	0	0	1	0	0	0	0	0	0	0	1	0	1	0	0	0	0	0	0	1
11280	Term	16.0843	3.8755	0	0.614458	16.6466	0.578313	0.552209	2.6506	0.536145	1.88554	0.556225	2.89157	46.8715	41.8571	26	4	2	0	no	57	56	55	38	64	81	54	24	0	1	0	0	0	0	0	0	0	0	0	1	0	1	0	0	0	0	0	1	1
11732	Preterm	266.196	0.070249	0	0.0508207	0.0905553	0.0718954	0.0183855	0.32545	0.0194282	0.0768348	0.231602	0.0779325	267.229	34.5714	26	3	2	0	no	87	85	76	94	60	88	91	36	0	0	0	1	0	0	1	1	0	0	0	0	0	1	0	0	0	0	0	0	0
11752	Preterm	235.16	45.0487	0	1.74717	51.1874	4.7693	1.23719	31.7324	3.06935	8.6603	7.11146	10.5775	400.3	36.7143	28	2	1	0	no	75	68	69	65	64	94	80	12	1	0	0	0	0	0	0	0	0	0	0	1	0	1	0	0	0	0	1	0	1
12486	Term	22.9122	6.31692	0	0.599572	26.3383	1.01499	0.633833	4.23983	0.569593	2.31263	1.16488	4.96788	71.0707	39	23	5	2	1	yes	97	98	95	97	89	100	98	25	1	0	0	0	0	0	0	0	0	0	0	1	0	1	0	0	0	0	0	0	1
12498	Term	79.5556	10.7333	0	1.06	70.2222	3.15556	1.12889	19.5556	0.484444	4.42222	3.17778	15.4444	208.94	41.8571	31	1	0	0	no	42	37	57	53	28	31	56	48	0	0	0	1	0	0	0	0	0	0	0	1	0	1	0	0	0	0	0	0	1
12630	Term	45.8661	8.0315	0	0.519685	15.9055	1.21457	0.627953	6.20079	0.411417	2.65748	1.7126	3.18898	86.3366	37.8571	21	2	1	0	no	67	40	75	94	26	51	87	69	0	0	1	0	0	0	0	0	0	0	0	1	0	1	0	0	0	0	0	0	1
12670	Term	32.2645	7.69539	0	0.340681	19.2184	0.947896	0.310621	3.68737	0.651303	1.98196	1.20641	4.1483	72.4529	38	31	3	2	0	no	38	26	57	55	36	25	55	48	0	0	0	1	0	0	0	0	0	0	0	1	0	1	0	0	0	0	0	0	1
12711	Preterm	174.124	22.2364	0	1.92042	142.423	7.48872	2.19148	62.4826	1.11642	8.91295	9.73993	29.036	461.673	34.7143	37	2	0	1	yes	24	28	7	4	48	96	1	14	1	0	0	0	0	0	0	0	0	0	0	1	0	1	0	0	0	0	0	0	1
12820	Preterm	200.829	10.818	0	8.72939	11.5142	11.1929	1.72446	43.7005	1.93867	11.1393	35.5602	34.3284	371.476	34.1429	35	3	2	0	no	19	21	10	60	2	17	29	43	0	0	0	1	1	0	0	0	0	0	0	0	1	0	0	0	0	0	0	0	0
13054	Term	27.49	5.57769	0	0.535857	40.4382	1.45618	0.794821	6.73307	0.424303	2.41036	0.7749	10	96.6355	39.7143	40	7	4	0	no	95	90	87	92	85	89	89	85	0	0	0	0	0	0	0	0	0	0	0	1	0	1	0	0	0	0	0	0	1
13164	Term	485.015	7.56624	0	4.33119	5.33517	7.61474	1.56175	21.3892	1.66845	11.7374	29.5859	28.6644	604.47	41.7143	34	1				75	68	69	65	64	94	80	12	0	0	0	1	0	0	0	0	0	0	1	0	1	0	0	0	0	0	0	0	0
13277	Preterm	10.1071	0.90729	0		1.11883		0.973104		1.10003	2.71717			16.9236	31.7143	41	2	1	0	no	87	85	76	94	60	88	91	36	1	0	0	0	0	0	0	0	0	0	0	1	0	1	0	0	0	0	0	0	1
13303	Term	14.1104	2.76074	0	0.263804	3.98773	0.0754601	0.185685	0.0744376	0.664622	1.64622	0.271984	1.08998	25.1311	39.2857	36	2	1	0	no	93	89	89	98	78	86	93	51	0	0	0	1	0	0	0	0	0	0	0	1	0	1	0	1	0	1	0	0	0
13743	Preterm	48.5338	10.8662	0	0.302274	11.5498	1.40432	1.03158	7.13549	7.98481	34.8823	2.47493	5.71193	131.877	36.7143	30	2	1	0	no	100	99	100	100	87	98	92	75	1	0	0	0	0	0	0	0	0	0	0	1	0	1	0	0	0	0	0	0	0
14026	Term	29.7189	5.46185	0	1.24297	75.3012	2.10843	1.05422	12.5703	0.433735	3.05221	1.00803	15.6225	147.574	38	41	2	0	0	no	94	88	90	98	72	86	92	70	0	1	0	0	0	1	0	0	0	1	0	1	0	1	0	0	0	1	0	0	0
14278	Term	97.3094	18.8565	0	1.24439	26.009	2.75785	0.903587	14.4843	0.495516	2.95964	4.6861	8.87892	178.585	39.2857	34	3	1	0	no	95	94	84	93	88	90	75	83	0	0	0	1	0	0	0	0	0	0	0	1	1	0	0	0	0	0	0	0	0
14494	Term	414.025	12.7392	0	11.7508	11.9156	10.5977	1.74615	47.3877	2.04816	7.02854	32.7815	35.7467	587.767	39	36	5				93	93	92	94	89	61	80	96	1	0	0	0	0	0	0	0	0	0	0	1	0	1	0	0	0	0	0	0	1
15163	Term	43.9645	11.3767	0	0	9.78107	1.30375	0.670611	9.49507	14.8679	32.8402	0.856016	4.3925	129.548	41	21	2	0	0	no	55	43	65	67	17	64	70	29	0	0	0	0	0	0	0	0	0	0	0	1	0	1	1	0	0	0	1	0	0
15680	Term	63.3526	8.90104	0	1.1942	87.1098	3.16763	1.55847	18.1505	0.722219	4.18127	1.79605	16.9151	207.049	38.2857	37	3	2	0	no	74	72	67	95	9	45	93	86	1	0	0	0	0	0	0	0	0	0	0	1	0	1	0	0	0	0	0	1	1
16000	Preterm	83.5808	19.5879	0	1.96736	62.5784	3.36895	1.68447	22.8883	0.93439	6.34357	3.85329	12.43	219.217	36.4286	25	2	1	0	no	97	98	95	97	89	100	98	25	1	0	0	0	0	0	0	0	0	0	0	1	0	1	0	0	0	0	0	0	1
17113	Term	28.0242	5.94758	0	0.75	11.5524	0.639113	0.596774	3.10484	0.540323	1.9254	2.11694	1.73185	56.9294	40.2857		1	0	0	no	52	58	34	67	47	51	75	9	0	0	0	1	0	0	0	0	0	0	0	1	1	0	0	0	0	0	0	0	0
18530	Preterm	455.098	70.7703	0		47.0438	7.36338	2.61809	48.1688	2.42378	15.6472	10.636	5.72708	665.496	36.7143	34	2	0	1	yes	3	3	11	9	4	6	35	22	0	0	0	1	0	0	0	0	0	0	1	0	1	0	0	0	0	0	0	0	0
19241	Term	13.3817	2.92531	0	0.620332	9.25311	0.356846	0.529046	1.44606	0.549793	1.71162	0.379668	1.8527	33.0062	40.7143	42	7	5	0	no	87	86	85	57	92	95	60	76	1	0	0	0	0	0	0	0	0	0	0	1	0	1	0	0	0	0	0	0	1
19349	Preterm	20.728	8.59387	0	0	9.30077	1.20307	0.59387	7.68391	3.41188	26.7433	0.869732	4.16858	83.2969	34	28	3	2	0	no	99	99	93	98	93	89	89	91	1	0	0	0	0	0	0	0	0	0	0	1	1	0	0	0	0	0	0	0	0
20100	Term	56.9231	13.0989	0	0.635165	34.5055	2.13407	0.821978	12.3297	0.468132	3.6044	2.46154	7.12088	134.103	39.1429	27	4	1	1	yes	86	73	79	94	50	85	92	61	0	0	0	1	0	0	0	0	0	0	1	0	1	0	0	0	0	0	0	0	1
20166	Term	49.7018	8.01193	0	0.972167	37.3757	1.84891	0.87674	12.2664	0.447316	2.80318	2.28628	6.87873	125.103	41.7143	21	1	0	0	no	100	99	100	100	87	98	92	75	1	0	0	0	0	0	0	0	0	0	0	1	0	1	0	0	0	0	0	1	1
20410	Term	27.6	5.5	1.63419	0.276	13.84	0.63	0.252	2.52	0.652	1.748	0.88	2.5	56.398	41	31	1	0	0	no	34	33	25	30	28	83	45	3	0	1	0	0	0	0	0	0	0	0	0	1	1	0	0	0	0	0	1	0	0
20484	Term	24.381	4.85714	0	0.826667	25.9048	0.885714	0.580952	4.47619	0.510476	1.87619	0.950476	4.68571	69.9352	40	31	1	0	0	no	34	33	25	30	28	83	45	3	1	0	0	0	0	0	0	0	0	0	0	1	1	0	0	0	0	0	1	0	0
20730	Preterm	543.03	6.5268	0	1.47767	4.17715	4.1406	1.64997	10.5995	1.81706	11.3305	23.9664	19.1105	627.826	35.4286	30	2	0	0	no	67	58	70	83	52	44	85	31	0	0	1	0	0	0	0	0	0	0	0	1	1	0	0	0	0	0	1	0	0
20791	Term	38.7755	5.59184	0	0.971429	31.4286	1.27959	0.783673	6.18367	0.440816	2.02449	0.763265	7	95.2429	38.1429	34	3	1	1	yes	21	17	43	39	19	28	36	7	0	1	0	0	0	0	0	0	1	0	0	1	0	1	0	0	0	1	0	0	0
20972	Term	97.5096	12.8927	0	1.12069	13.4291	1.93487	0.94636	13.3525	0.41954	4.61686	3.90805	6.6092	156.739	38.1429	31	4	1	0	no	4	3	1	19	11	1	51	9	0	0	0	1	0	0	0	0	0	0	0	1	1	0	0	0	0	0	0	0	0
20991	Term	67.1639	17.4089	0	0.870444	102.089	5.80296	1.30298	28.2088	0.596415	6.4746	6.12535	24.3402	260.384	39	30	3	2	0	no	68	48	82	49	53	93	69	48	0	1	0	0	0	0	0	0	0	0	0	1	0	1	0	0	0	0	0	0	1
21275	Term	103.488	10.8837	0	1.34419	89.7674	4.4186	1.22558	26.0465	0.530233	4.76744	4.81395	18.6512	265.937	37.7143	34	1	0	0	no	44	34	39	27	56	88	56	22	0	1	0	0	0	0	0	0	0	0	0	1	0	1	0	0	0	0	0	0	0
21594	Term	105.439	14.7071	0	0.552301	19.6444	3.61925	0.740586	18.7029	0.485356	4.58159	5.69038	11.6527	185.816	40.8571	17	1	0	0	no	94	93	85	99	79	78	96	67	1	0	0	0	0	0	0	0	0	0	0	1	0	1	0	0	0	0	0	0	0
21604	Term	117.434	18.8617	0	1.12736	129.358	6.10655	1.78499	30.8941	0.823843	5.70908	5.23935	29.0152	346.354	39.4286	42	7	3	0	no	89	74	78	98	79	77	96	67	1	0	0	0	0	0	0	0	1	0	0	1	0	1	0	0	0	1	0	0	1
21923	Term	59.3625	12.7291	0	0.629482	22.1116	1.67928	0.806773	10.1793	0.430279	3.68526	2.62948	4.82072	120.167	41.8571	34	2	1	0	no	41	41	47	9	64	94	35	4	0	0	0	1	0	0	0	0	0	0	0	1	0	0	0	0	0	0	0	1	0
22125	Term	331.581	57.1691	1.10359	0.297952	77.3464	6.06665	1.76215	42.3051	1.62764	5.51513	8.13818	12.3082	544.117	40.4286	31	1				65	52	76	74	15	69	80	44	1	0	0	0	0	0	0	0	0	0	0	1	1	0	0	0	0	0	0	0	0
22183	Preterm	70.3577	10.5923	0	0.656414	54.3533	1.06696	1.80147	14.922	1.90971	5.81418	1.97156	9.97379	173.419	33.4286	38	5	0	3	yes	94	88	90	98	72	86	92	70	1	0	0	0	0	1	0	0	0	0	0	1	0	1	0	0	0	0	0	0	1
22309	Term	32.58	11.8832	0	0.636535	15.3107	1.2354	0.502825	6.55367	0.499058	2.99435	2.25989	2.6177	77.0734	39.8571	26	2	0	0	no	83	73	71	97	59	61	94	82	0	0	0	1	0	0	0	1	0	0	0	1	1	0	0	0	0	0	0	1	0
22801	Term	28.8538	5.6917	0	0.250988	6.50198	0.490119	0.209486	2.52964	0.640316	1.74308	0.826087	1.35375	49.0909	39.8571	41	2	0	0	no	15	17	23	35	17	11	58	1	0	1	0	0	0	0	0	1	0	0	0	1	1	0	0	0	0	0	0	1	0
26605	Term	106.827	23.7467	0	0.93267	29.6007	3.06921	1.23695	19.4472	0.724308	6.7139	4.92794	9.85588	207.083	37.5714	34	2	1	0	no	92	83	89	94	64	89	92	74	1	0	0	0	0	0	0	0	0	1	0	1	0	1	0	0	0	1	0	0	1
26672	Term	20.232	4.45876	0	0.907216	12.3711	0.582474	0.670103	2.62887	0.685567	1.90979	0.554124	2.57732	47.5773	37.5714	23	2	1	0	no	91	87	86	94	83	78	88	58	1	0	0	0	0	0	0	0	0	0	0	1	0	1	0	0	0	0	0	0	0
26755	Preterm		5.26415	0		2.93711	0	1.83019		2.02516	0	1	1.78616	14.8428	36.8571	35	3	2	0	no	46	43	50	38	37	52	76	41	1	0	0	0	0	0	0	0	0	1	0	1	0	1	0	0	0	0	0	0	1
27298	Term	21.0204	5.34694	0	0.810204	24.6939	0.761224	0.597959	5.69388	0.54898	2.32653	0.818367	4.40816	67.0265	39.2857	32	2	1	0	no	95	91	82	99	92	85	92	58	1	0	0	0	0	0	0	1	0	0	0	1	0	1	0	0	0	1	0	0	1
27915	Preterm	16.0968	3.83669	0	0	2.60887	0.633065	0.639113	1.5121	0.427419	11.8952	0.665323	2.24194	40.5565	31.4286	28	3	1	0	no	67	67	89	66	45	39	50	68	1	0	0	0	1	1	0	0	0	0	0	1	1	0	0	0	0	0	0	0	1
27927	Term	48.46	9.30185	0	0.63655	25.8727	1.45175	0.755647	11.2526	0.433265	2.75154	1.49692	5.72895	108.142	37.1429	30	1	0	0	no	75	68	69	65	64	94	80	12	1	0	0	0	0	0	0	0	0	0	0	1	0	1	0	0	0	0	0	0	0
28095	Term	30.3666	10.5723	0	0	7.87984	1.31365	0.635438	8.25662	18.2811	21.3238	0.566191	4.23218	103.428	37.1429	35	2	0	0	no	39	29	49	39	46	74	26	9	1	0	0	0	0	0	0	0	0	0	0	1	1	0	0	0	0	0	0	0	0
28237	Term	222.752	6.83796	0	17.8201	9.63531	9.11728	1.67323	33.8272	2.07211	10.775	27.7145	28.4397	370.664	40.2857	34	2	1	0	no	39	54	39	51	32	17	69	29	0	0	0	1	0	0	0	1	0	0	0	1	1	0	0	0	0	0	0	0	0
28323	Term	223.884	7.23317	0	12.9902	7.03635	5.6094	1.56473	20.8138	1.8698	6.88873	23.1265	20.617	331.633	37.4286	39	6	3	1	yes	92	95	94	100	70	67	91	48	1	0	0	0	0	1	0	1	0	0	0	1	1	0	0	0	0	0	0	0	0
28324	Term	16.9757	4.19426	0	0.845475	18.9625	0.646799	0.622517	3.35541	0.591611	2.31788	1.24503	3.37748	53.1347	40.5714	32	4	1	0	no	14	16	40	25	2	14	31	24	1	0	0	0	0	0	0	1	0	0	0	1	1	0	0	0	0	0	0	0	0
28382	Preterm	213.636	26.5828	0	1.32218	105.078	4.55108	1.99023	31.8715	1.76059	6.52043	4.57892	22.4075	420.3	32.2857	33	5	0	3	yes	97	98	95	97	89	100	98	25	0	0	1	0	0	0	0	0	0	0	0	1	0	1	0	0	0	0	0	0	1
28684	Term	62.3608	9.55457	0	0.904232	32.5167	2.07127	0.855234	11.3363	0.485523	3.02895	2.17149	7.21604	132.501	40.8571	38	1	0	0	no	12	6	14	7	37	47	37	3	0	1	0	0	0	0	0	0	0	0	0	1	1	0	0	0	0	0	0	0	0
28687	Term	73.0159	10.4365	0	0.628968	53.373	3.09524	0.90873	16.4286	0.454365	2.77778	3.4127	12.1627	177.448	39.1429	26	2	1	0	no	80	74	81	89	77	65	49	60	0	0	0	1	0	0	0	0	0	0	0	1	1	0	0	0	0	0	0	0	1
28731	Term	233.321	9.35461	0.753968	7.61421	10.0073	9.51777	1.7839	35.4061	1.94706	10.6055	30.5112	34.4815	384.55	37.4286	29	2	0	0	no	94	88	90	98	72	86	92	70	0	0	1	0	0	0	0	0	0	0	0	1	1	0	0	0	0	0	0	0	0
28832	Term	66.9903	16.3107	0	0.924272	28.5437	2.05825	0.654369	12.4078	0.547573	2.09709	3.86408	5.51456	139.913	37.1429	23	2	1	0	no	5	5	5	22	7	10	41	8	0	1	0	0	0	0	0	0	0	0	1	0	1	0	0	0	0	0	0	0	0
29033	Preterm	446.649	7.70499	0	3.36492	11.7983	8.78851	2.02256	40.5716	2.0346	13.0022	31.5423	6.56128	574.04	33.1429	41	1	0	0	no	39	29	49	39	46	74	26	9	0	0	0	1	0	0	0	0	0	0	0	1	1	0	0	0	0	0	0	0	0
29151	Preterm	20.4054	8.19691	0	0	8.0444	1.0251	0.633205	6.38996	5.43436	14.8359	0.478764	3.53861	68.9826	36.5714	36	2	1	0	no	91	81	77	93	80	86	93	70	1	0	0	0	0	0	0	0	0	0	0	1	0	1	0	0	0	1	0	0	1
29265	Preterm	35.3293	7.16567	0	0.842315	54.491	2.33533	0.834331	13.0339	0.443114	2.67465	1.74251	12.8144	131.707	36.8571	33	2	1	0	no	61	52	67	83	21	48	79	33	1	0	0	0	0	1	0	0	0	0	0	1	1	0	0	0	0	0	0	0	0
29556	Preterm	42.607	8.32685	0	0.484436	17.9183	1.21012	0.63035	6.94553	0.410506	2.45136	1.5856	3.77432	86.3444	34.4286	43	2	0	0	no	54	69	48	90	17	14	93	5	0	0	0	1	0	1	0	1	0	0	0	1	1	0	0	0	0	1	0	0	0
29576	Term	33.4677	6.69355	0	0.65121	12.9032	0.949597	0.663306	5.34274	0.421371	2.11694	0.969758	2.35887	66.5383	39.4286	34	1	0	0	no	10	13	9	35	6	10	48	14	0	0	1	0	0	0	0	0	0	0	0	1	1	0	0	0	0	0	0	0	0
29641	Term	297.456	11.4202	0	17.1303	7.17081	6.62636	2.13796	21.7116	2.50314	11.7522	25.4962	28.484	431.888	39.7143	33	4	2	0	no	88	73	90	93	57	77	93	80	1	0	0	0	0	0	0	0	0	0	0	1	0	1	0	0	0	0	0	0	1
29774	Preterm	43.3198	6.37652	0	0.603239	25.9109	1.19433	0.702429	8.7247	0.433198	1.60729	1.05466	5.18219	95.1093	32.8571	38	1	0	0	no	79	67	80	71	75	72	70	71	0	0	1	0	0	1	0	0	0	0	0	1	0	1	0	0	0	1	0	0	1
29799	Term	83.3526	13.5974	0	1.8186	66.9346	3.48986	1.80176	24.0796	0.976656	5.97781	4.17605	12.124	218.329	39.7143	32	2	0	0	no	71	100	94	94	93	2	1	1	0	0	1	0	0	0	0	0	0	0	0	1	1	0	0	0	1	0	0	0	0
29860	Preterm	160.294	26.7157	0	3.25643	63.1069	3.48027	2.32499	26.4991	1.97841	9.45881	5.48756	13.9355	316.538	36.7143	39	5	1	1	yes	15	17	23	35	17	11	58	1	1	0	0	0	0	0	0	0	0	0	1	0	1	0	0	0	0	0	0	0	1
29975	Term	127.239	17.4762	0	1.19191	57.4874	3.05067	1.44868	23.4932	0.812489	4.67565	2.00056	11.8041	250.68	39.1429	32	2	0	0	no	87	86	85	57	92	95	60	76	0	1	0	0	0	0	0	0	0	0	0	1	1	0	0	0	0	0	0	1	0
30119	Term	21.7213	4.54918	0	0.766393	19.3852	0.653689	0.594262	3.31967	0.545082	1.87295	0.854508	3.29918	57.5615	37	26	2	1	0	no	94	94	83	94	83	92	95	39	1	0	0	0	0	0	0	0	0	0	0	1	1	0	0	0	0	0	0	0	1
[truncated: 41 more columns]

## Sheet: S1b
Table S1b: Raw Extracted Ion Chromatogram Spectrum of the 12 polymers MNPs analyzed and the Pyrolysis-Gas Chromatography/Mass Spectrometry parameters for analysis, related to Table 2 and Figs. 1-4.
Polymers of Interest	Extracted – Ion Chromatogram Spectrum (EIC)
Polyethylene (PE)	***m/z: 82 - 1,20-Heneicosadine (C21”)***
	m/z: 294 -1,20-Heneicosadine (C21”)
	m/z: 83 - 1-Dodecene (C12)
	m/z: 83 - 1-Hexadecene (C16)
Polypropylene (PP)	***m/z: 126 - 2,4-Dimethyl-1-heptene (C9’)
	m/z: 70 - 2,4-Dimethyl-1-heptene (C9’)
	m/z: 97 - 2,4,6-Trimethyl-1-nonene
	m/z: 69 - 2,4,6,8-Tetramethyl-1-undecene
Polyvinyl Chloride (PVC)	***m/z: 128 - Naphthalene (Naph)***
	m/z: 115 - Naphthalene (Naph)
	m/z: 91 - Toluene
	m/z: 116 - Indene
	m/z: 78 - Benzene
Polyethylene Terephthalate (PET)	***m/z: 182 - Benzophenone (BP)***
	m/z: 105 - Benzophenone (BP)
	m/z: 78 - Benzene
	m/z: 122 - Benzoic Acid
	m/z: 154 - Diphenyl
Polystyrene (PS)	***m/z: 91 - Styrene Trimer (SSS)***
	m/z: 312 - Styrene Trimer (SSS)
	m/z:104 - Styrene
	m/z:130 - Styrene Dimer
Polycarbonate (PC)	***m/z: 134 - 4-isopropenylphenol (IPP)***
	m/z: 119 - 4-isopropenylphenol (IPP)
	m/z: 94 - Phenol
Polyurethane (PU)	***m/z: 198 - 4,4’-Methylenedianiline (MDA)***
	m/z: 106 - 4,4’-Methylenedianiline (MDA)
Styrene Butadiene Rubber (SBR)	***m/z: 104- 4-Phenylcyclohexene (SB)***
	m/z: 158 - 4-Phenylcyclohexene (SB)
	m/z: 104 - Styrene
	m/z: 162 - Butadiene Trimer (C12H18)
Polymethyl Methacrylate (PMMA)	***m/z: 100 - Methyl Methacrylate (MMA)***
	m/z: 69 - Methyl Methacrylate (MMA)
	m/z: 55,85 - methyl acrylate
Acronitrile Butadiene Styrene Resin (ABS)	***m/z: 170 - 2-Phenethyl-4-phenylpent-4-enenitrile (SAS)***
	m/z: 91 - 2-Phenethyl-4-phenylpent-4-enenitrile (SAS)
	m/z: 91 - 2-Methylene-4-phenylbutanenitrile
	m/z: 144 - 2-methylene-4-phenylheptanedinitrile
Nylon 6 (N6)	***m/z: 113 - e-Caprolactam (Capro)***
	m/z: 85 - e-Caprolactam (Capro)
Nylon 66 (N66)	***m/z: 84 - Cyclopentanone (CP)***
	m/z: 55 - Cyclopentanone (CP)
	m/z:112 - 1,8-Diazacyclotetradecane-2,7-dione
Pyrolysis – Gas Chromatography/Mass Spectrometry Parameters [Garcia et al., Tox Sci. (2024)]
Micro furnance pyrolyzer (EGA/PY-3030D Pyrolysis unit)
Mode	Single shot
Carrier gas	Helium
Temperature	600oc
Pyrolysis time	0.2 minutes
Transfer line temperature	280oc
Gas chromatograph (Agilent 8890 (Agilent, Santa Clara, CA))
Injector	2 days, 2:01:00
Mode	split
Temperature	300oc
Column	Ultra Alloy microplastics (UAMP) Column kit specifically designed for microplastics analysis (UA5-30M- 0.5F, Frontier Labs, Koriyama, Japan
Flow (const.) or pressure (cons)	14.3 psi
Temperature program	40oc hold 2 minutes
	Ramp @20oc/min to 280oc hold for 10 minutes
	Ramp @40oc to 320oc hold for 15min
Tranfer line temperature	280oc
Mass spectrometer (5977 MSD system (Agilent, Santa Clara, CA))
Ionization energy	69.9 (70eV)
Scan rate	3.42 scan/s
Scan range	30-450
Polymer	0.1mg Calibration Standard (ug)	0.2mg Calibration Standard (ug)	0.5mg Calibration Standard (ug)	2.0mg Calibration Standard (ug)	4.0mg Calibration Standard (ug)
PE	4	8	20	80	160
PP	1	2	5	20	40
PS	0.2	0.4	1	4	8
ABS	0.4	0.8	2	8	16
SBR	0.4	0.8	2	8	16
PMMA	0.2	0.4	1	4	8
PC	0.1	0.2	0.5	2	4
PVC	1	2	5	20	40
PU	0.1	0.2	0.5	2	4
PET	0.4	0.8	2	8	16
N6	0.125	0.25	0.625	2.5	5
N66	0.45	0.9	2.25	9	18

## Sheet: S1c
Table S1c: Spearman’s correlation analysis of select numerical variables with Benjamini-Hochberg multiple corrections, related to Fig. 2a.
Spearman's correlation coefficients
	Birth.weight	Gestational_Age	PU	PET	PriorPretermBirth	PP	CumulativeMNPs	PC	PVC	N6	PMMA	PE	N66	ABS	SBR
Birth.weight	1	0.759088	-0.347727	-0.260178	-0.171348	-0.0457793	-0.0903979	-0.136796	-0.115774	-0.0631247	-0.0470722	-0.0362495	-0.0397351	0.0854819	0.0988683
Gestational_Age	0.759088	1	-0.388291	-0.370102	-0.232654	-0.0852793	-0.114996	-0.163328	-0.132999	-0.0623487	-0.0610907	-0.0472401	-0.0628993	0.209133	0.112497
PU	-0.347727	-0.388291	1	0.761929	0.119399	0.382298	0.322687	0.294279	0.288777	0.287387	0.266648	0.221758	0.177975	-0.165362	-0.2616
PET	-0.260178	-0.370102	0.761929	1	0.123724	0.547508	0.560061	0.46453	0.518554	0.476451	0.53884	0.406815	0.413141	-0.0339316	-0.101036
PriorPretermBirth	-0.171348	-0.232654	0.119399	0.123724	1	0.124208	0.17934	0.207714	0.121397	0.127516	0.132567	0.170038	0.162839	0.0754647	0.171964
PP	-0.0457793	-0.0852793	0.382298	0.547508	0.124208	1	0.734376	0.563158	0.747176	0.693266	0.719289	0.710414	0.524619	0.213708	0.500331
CumulativeMNPs	-0.0903979	-0.114996	0.322687	0.560061	0.17934	0.734376	1	0.793586	0.927294	0.885815	0.932088	0.931372	0.807863	0.537248	0.438322
PC	-0.136796	-0.163328	0.294279	0.46453	0.207714	0.563158	0.793586	1	0.860258	0.733613	0.793142	0.736388	0.760294	0.615705	0.46655
PVC	-0.115774	-0.132999	0.288777	0.518554	0.121397	0.747176	0.927294	0.860258	1	0.865057	0.949095	0.847801	0.80924	0.59369	0.52101
N6	-0.0631247	-0.0623487	0.287387	0.476451	0.127516	0.693266	0.885815	0.733613	0.865057	1	0.901789	0.855871	0.750975	0.581017	0.326853
PMMA	-0.0470722	-0.0610907	0.266648	0.53884	0.132567	0.719289	0.932088	0.793142	0.949095	0.901789	1	0.858327	0.845738	0.582454	0.440756
PE	-0.0362495	-0.0472401	0.221758	0.406815	0.170038	0.710414	0.931372	0.736388	0.847801	0.855871	0.858327	1	0.683428	0.52267	0.365715
N66	-0.0397351	-0.0628993	0.177975	0.413141	0.162839	0.524619	0.807863	0.760294	0.80924	0.750975	0.845738	0.683428	1	0.570615	0.525388
ABS	0.0854819	0.209133	-0.165362	-0.0339316	0.0754647	0.213708	0.537248	0.615705	0.59369	0.581017	0.582454	0.52267	0.570615	1	0.427723
SBR	0.0988683	0.112497	-0.2616	-0.101036	0.171964	0.500331	0.438322	0.46655	0.52101	0.326853	0.440756	0.365715	0.525388	0.427723	1
Spearman's p-values and adjusted p-values with Benjamini-Hochberg multiple corrections
	xName	yName	x	y	corr	p.value	q.value
1	Birth.weight	Birth.weight	1	15	1	0	0
2	Birth.weight	Gestational_Age	1	14	0.759088	1.36878e-35	1.39615e-33
3	Birth.weight	PU	1	13	-0.347727	0.00111142	0.0700196
4	Birth.weight	PET	1	12	-0.260178	0.0504938	1
5	Birth.weight	PriorPretermBirth	1	11	-0.171348	0.00844421	0.447543
6	Birth.weight	PP	1	10	-0.0457793	0.18996	1
7	Birth.weight	CumulativeMNPs	1	9	-0.0903979	0.104674	1
8	Birth.weight	PC	1	8	-0.136796	0.0479041	1
9	Birth.weight	PVC	1	7	-0.115774	0.0688605	1
10	Birth.weight	N6	1	6	-0.0631247	0.354375	1
11	Birth.weight	PMMA	1	5	-0.0470722	0.174556	1
12	Birth.weight	PE	1	4	-0.0362495	0.12893	1
13	Birth.weight	N66	1	3	-0.0397351	0.637316	1
14	Birth.weight	ABS	1	2	0.0854819	0.412021	1
15	Birth.weight	SBR	1	1	0.0988683	0.617316	1
16	Gestational_Age	Gestational_Age	2	14	1	0	0
17	Gestational_Age	PU	2	13	-0.388291	0.00130525	0.0809257
18	Gestational_Age	PET	2	12	-0.370102	0.00065771	0.0427512
19	Gestational_Age	PriorPretermBirth	2	11	-0.232654	0.00167876	0.100726
20	Gestational_Age	PP	2	10	-0.0852793	0.367359	1
21	Gestational_Age	CumulativeMNPs	2	9	-0.114996	0.313016	1
22	Gestational_Age	PC	2	8	-0.163328	0.23954	1
23	Gestational_Age	PVC	2	7	-0.132999	0.184662	1
24	Gestational_Age	N6	2	6	-0.0623487	0.527068	1
25	Gestational_Age	PMMA	2	5	-0.0610907	0.717032	1
26	Gestational_Age	PE	2	4	-0.0472401	0.354091	1
27	Gestational_Age	N66	2	3	-0.0628993	0.832871	1
28	Gestational_Age	ABS	2	2	0.209133	0.584848	1
29	Gestational_Age	SBR	2	1	0.112497	0.353961	1
30	PU	PU	3	13	1	0	0
31	PU	PET	3	12	0.761929	1.56386e-25	1.51695e-23
32	PU	PriorPretermBirth	3	11	0.119399	0.326433	1
33	PU	PP	3	10	0.382298	0.195783	1
34	PU	CumulativeMNPs	3	9	0.322687	0.728583	1
35	PU	PC	3	8	0.294279	2.98063e-12	2.53354e-10
36	PU	PVC	3	7	0.288777	0.84585	1
37	PU	N6	3	6	0.287387	0.000422554	0.0278886
38	PU	PMMA	3	5	0.266648	0.000893616	0.0571914
39	PU	PE	3	4	0.221758	0.289172	1
40	PU	N66	3	3	0.177975	0.0402036	1
41	PU	ABS	3	2	-0.165362	0.00408171	0.228576
42	PU	SBR	3	1	-0.2616	0.00232395	0.134789
43	PET	PET	4	12	1	0	0
44	PET	PriorPretermBirth	4	11	0.123724	0.507438	1
45	PET	PP	4	10	0.547508	0.0599262	1
46	PET	CumulativeMNPs	4	9	0.560061	0.121592	1
47	PET	PC	4	8	0.46453	0.00239899	0.136742
48	PET	PVC	4	7	0.518554	0.404538	1
49	PET	N6	4	6	0.476451	0.0187581	0.956661
50	PET	PMMA	4	5	0.53884	0.020243	1
51	PET	PE	4	4	0.406815	0.690052	1
52	PET	N66	4	3	0.413141	0.135176	1
53	PET	ABS	4	2	-0.0339316	0.177003	1
54	PET	SBR	4	1	-0.101036	0.00488839	0.263973
55	PriorPretermBirth	PriorPretermBirth	5	11	1	0	0
56	PriorPretermBirth	PP	5	10	0.124208	0.13467	1
57	PriorPretermBirth	CumulativeMNPs	5	9	0.17934	0.0540941	1
58	PriorPretermBirth	PC	5	8	0.207714	0.54544	1
59	PriorPretermBirth	PVC	5	7	0.121397	0.0660931	1
60	PriorPretermBirth	N6	5	6	0.127516	0.867444	1
61	PriorPretermBirth	PMMA	5	5	0.132567	0.506152	1
62	PriorPretermBirth	PE	5	4	0.170038	0.128348	1
63	PriorPretermBirth	N66	5	3	0.162839	0.231714	1
64	PriorPretermBirth	ABS	5	2	0.0754647	0.943723	1
65	PriorPretermBirth	SBR	5	1	0.171964	0.00421486	0.231817
66	PP	PP	6	10	1	0	0
67	PP	CumulativeMNPs	6	9	0.734376	9.86591e-24	9.37262e-22
68	PP	PC	6	8	0.563158	0.00179735	0.106044
69	PP	PVC	6	7	0.747176	3.59305e-23	3.37746e-21
70	PP	N6	6	6	0.693266	0.417314	1
71	PP	PMMA	6	5	0.719289	1.35029e-09	1.10724e-07
72	PP	PE	6	4	0.710414	1.50101e-15	1.30588e-13
73	PP	N66	6	3	0.524619	0.00143639	0.0876197
74	PP	ABS	6	2	0.213708	0.945747	1
75	PP	SBR	6	1	0.500331	3.30861e-10	2.77923e-08
76	CumulativeMNPs	CumulativeMNPs	7	9	1	0	0
77	CumulativeMNPs	PC	7	8	0.793586	2.15079e-05	0.00152706
78	CumulativeMNPs	PVC	7	7	0.927294	1.57958e-47	1.64276e-45
79	CumulativeMNPs	N6	7	6	0.885815	1.61323e-07	1.22605e-05
80	CumulativeMNPs	PMMA	7	5	0.932088	1.03379e-30	1.03379e-28
81	CumulativeMNPs	PE	7	4	0.931372	4.01455e-79	4.21528e-77
82	CumulativeMNPs	N66	7	3	0.807863	1.15382e-19	1.04997e-17
83	CumulativeMNPs	ABS	7	2	0.537248	2.15227e-07	1.6142e-05
84	CumulativeMNPs	SBR	7	1	0.438322	1.15414e-07	8.88687e-06
85	PC	PC	8	8	1	0	0
86	PC	PVC	8	7	0.860258	3.76698e-06	0.000274989
87	PC	N6	8	6	0.733613	0.000202472	0.0135656
88	PC	PMMA	8	5	0.793142	2.25458e-25	2.16439e-23
89	PC	PE	8	4	0.736388	0.0256933	1
90	PC	N66	8	3	0.760294	2.1197e-15	1.82294e-13
91	PC	ABS	8	2	0.615705	1.26928e-17	1.12966e-15
92	PC	SBR	8	1	0.46655	0.0496921	1
93	PVC	PVC	9	7	1	0	0
94	PVC	N6	9	6	0.865057	0.000179158	0.0121828
95	PVC	PMMA	9	5	0.949095	1.90806e-35	1.92714e-33
96	PVC	PE	9	4	0.847801	9.4816e-26	9.29196e-24
97	PVC	N66	9	3	0.80924	1.22561e-22	1.13982e-20
98	PVC	ABS	9	2	0.59369	1.0327e-07	8.05507e-06
99	PVC	SBR	9	1	0.52101	8.25745e-16	7.26656e-14
100	N6	N6	10	6	1	0	0
101	N6	PMMA	10	5	0.901789	3.5512e-09	2.87647e-07
102	N6	PE	10	4	0.855871	4.13483e-05	0.00289438
103	N6	N66	10	3	0.750975	1.81337e-06	0.000134189
104	N6	ABS	10	2	0.581017	5.16304e-08	4.0788e-06
105	N6	SBR	10	1	0.326853	0.217209	1
106	PMMA	PMMA	11	5	1	0	0
107	PMMA	PE	11	4	0.858327	9.16179e-18	8.24561e-16
108	PMMA	N66	11	3	0.845738	2.53189e-45	2.60785e-43
109	PMMA	ABS	11	2	0.582454	7.16704e-28	7.09537e-26
110	PMMA	SBR	11	1	0.440756	0.000137152	0.00946348
111	PE	PE	12	4	1	0	0
112	PE	N66	12	3	0.683428	3.46441e-10	2.87546e-08
113	PE	ABS	12	2	0.52267	1.29717e-05	0.00093396
114	PE	SBR	12	1	0.365715	0.0172485	0.896923
115	N66	N66	13	3	1	0	0
116	N66	ABS	13	2	0.570615	6.51184e-21	5.9909e-19
117	N66	SBR	13	1	0.525388	1.23997e-08	9.91975e-07
118	ABS	ABS	14	2	1	0	0
119	ABS	SBR	14	1	0.427723	0.177936	1
120	SBR	SBR	15	1	1	0	0

## Sheet: S1d
Table S1d: Table S1d: Unadjusted and adjusted regression models for preterm birth and MNPs. The unadjusted model excludes covariates, while the adjusted model includes maternal, fetal, and labor-related covariates. Columns show coefficients, standard errors, z-values, p-values, significance (p<0.05, *p<0.01, **p<0.001), AORs, 95% CIs, and VIFs. Undefined or infinite CIs are marked as NA, related …
Model	Predictor	β	Lower 95% CI	Upper 95% CI	Adjusted Odds Ratio	Pr(>|z|)	Significance	Std. Error	z value	VIF
Unadjusted	(Intercept)	-0.1308	0.5789	1.3475	0.8774	0.541125		0.214	-0.611	NA
Unadjusted	N6	0.4366	0.4837	7.9237	1.5474	0.571966		0.7725	0.565	12.2266
Unadjusted	N66	-0.6127	0.2039	1.3614	0.5419	0.200318		0.4785	-1.281	5.6118
Unadjusted	PE	-0.4514	0.2035	1.6487	0.6367	0.380848		0.5151	-0.876	5.5337
Unadjusted	PET	-0.1272	0.3291	2.2155	0.8806	0.790407		0.4784	-0.266	4.9588
Unadjusted	PU	0.6201	0.7888	4.6602	1.8592	0.162888		0.4444	1.395	3.7573
Unadjusted	PP	-1.1922	0.103	0.819	0.3036	0.023082	*	0.5247	-2.272	6.879
Unadjusted	ABS	-1.7787	0.0551	0.4167	0.1689	0.000541	***	0.5142	-3.459	5.7168
Unadjusted	SBR	-0.7702	0.1459	1.4124	0.4629	0.181452		0.5763	-1.336	8.6086
Unadjusted	PC	1.8313	2.3677	21.0839	6.2421	0.001075	**	0.56	3.27	4.9369
Unadjusted	PVC	1.8466	1.3294	35.0172	6.3385	0.02659	*	0.8328	2.217	15.8139
Adjusted	(Intercept)	-3.10555	0.0058	0.2397	0.0448	0.00094	***	0.93881	-3.308	NA
Adjusted	N6	0.57593	0.5685	17.7229	1.7788	0.503582		0.86105	0.669	7.32165
Adjusted	N66	-0.74171	0.0935	1.9137	0.4763	0.319641		0.74529	-0.995	6.44222
Adjusted	PE	-0.15765	0.2235	3.0808	0.8542	0.801166		0.62598	-0.252	4.63114
Adjusted	PET	-0.55285	0.1108	3.0086	0.5753	0.496414		0.81284	-0.68	8.37078
Adjusted	PU	0.6865	0.389	9.7734	1.9867	0.390874		0.80008	0.858	8.03608
Adjusted	PP	-1.471	0.043	0.9213	0.2297	0.050831	.	0.75324	-1.953	8.89073
Adjusted	ABS	-2.56383	0.0152	0.2691	0.077	0.00036	***	0.71865	-3.568	4.24394
Adjusted	SBR	-1.48026	0.0397	1.1743	0.2276	0.07924	.	0.8434	-1.755	9.30814
Adjusted	PC	1.9434	2.0542	37.2604	6.9824	0.006815	**	0.71825	2.706	4.31827
Adjusted	PVC	2.86994	1.5785	278.307	17.6359	0.028089	*	1.30687	2.196	19.0166
Adjusted	PriorPretermBirth.YesTRUE	0.54681	0.4798	6.8808	1.7277	0.413489		0.66866	0.818	1.39685
Adjusted	Ethnicity_Race_Hispanic_White1	2.46973	2.3666	75.8917	11.8192	0.004697	**	0.87358	2.827	2.42543
Adjusted	Ethnicity_Race_Non.Hispanic_Black1	1.21043	0.4636	26.8869	3.3549	0.234954		1.01914	1.188	2.16838
Adjusted	Ethnicity_Race_Non.Hispanic_White1	-0.97797	0.0186	5.5997	0.3761	0.490609		1.41871	-0.689	2.2062
Adjusted	Hypertension_Yes1	1.59854	0.822	42.0702	4.9458	0.104726		0.98532	1.622	1.39881
Adjusted	Type.of.labor_Spontaneous1	1.86547	0.911	56.368	6.459	0.074665	.	1.04654	1.783	1.46091
Adjusted	Preeclampsia_Yes1	3.12732	4.182	178.558	22.8127	0.000873	***	0.93956	3.328	1.73988
Adjusted	PPROM_Yes1	18.2061	1.353e-36		80686940	0.992041		1825.01	0.01	1
Adjusted	Other.Medically.Indicated_Yes1	-2.52433	0.0024	1.1641	0.0801	0.091407	.	1.49544	-1.688	1.34733
Adjusted	APGAR.at.1.minute	0.09931	0.5723	2.175	1.1044	0.76456		0.3316	0.299	1.75025
